# Supplementary material
Source: ML conference proceedings conference paper supplement (https://proceedings.neurips.cc/paper_files/paper/2018/hash/a00e5eb0973d24649a4a920fc53d9564-Abstract.html)
Supplement: Supplementary file [file a00e5eb0973d24649a4a920fc53d9564-Supplemental.zip]

---

# Supplementary material for GumBolt: Extending Gumbel trick to Boltzmann priors

---

**Amir H. Khoshaman**  
D-Wave Systems Inc.  
khoshaman@gmail.com

**Mohammad H. Amin**  
D-Wave Systems Inc.  
Simon Fraser University  
mhsamin@dwavesys.com

## A Theorems regarding GumBolt

**Theorem 1.** For any polynomial function  $E_\theta(z)$  of  $n_z$  binary variables  $z \in \{0, 1\}^{n_z}$ , the extrema of the relaxed function  $E_\theta(\zeta)$  with  $\zeta \in [0, 1]^{n_z}$  reside on the vertices of the hypercube, i.e.,  $\zeta_{\text{extr}} \in \{0, 1\}^{n_z}$ .

*Proof.* For a binary variable  $z_i$  and an integer  $n$ , we have

$$z_i^n \equiv \underbrace{z_i \dots z_i}_{n \text{ times}} = z_i.$$

Therefore, the polynomial function  $E_\theta(z)$  can only have linear dependence on  $z_i$  and can be written as

$$E_\theta(z) = \sum_i z_i g_{i\theta}(z_{-i}), \quad (1)$$

where  $g_{i\theta}(z_{-i})$  is a polynomial function of all  $z_{j \neq i}$  with  $j < i$ , to exclude double-counting. The energy function of a BM is a special case of this equation. The relaxed function will have derivatives

$$\frac{\partial E_\theta(\zeta)}{\partial \zeta_i} = g_\theta(\zeta_{-i}). \quad (2)$$

Due to the linearity of the equation, for nonzero  $g_\theta(\zeta_{-i})$  there is always ascent or descent direction for  $\zeta_i$ , therefore, the extrema will be on the vertices of the hypercube.  $\square$

**Theorem 2.** For any polynomial function  $E_\theta(z)$  of binary variables  $z \in \{0, 1\}^{n_z}$ , the proxy probability  $\check{p}_\theta(\zeta) \equiv e^{-E_\theta(\zeta)} / Z_\theta$ , with  $\zeta \in [0, 1]^{n_z}$ , is a lower bound to the true probability  $p_\theta(\zeta) \equiv e^{-E_\theta(\zeta)} / \tilde{Z}_\theta$ , i.e.,  $\check{p}_\theta(\zeta) \leq p_\theta(\zeta)$ , where  $Z_\theta \equiv \sum_{\{z\}} e^{-E_\theta(z)}$  and  $\tilde{Z}_\theta \equiv \int_{\{\zeta\}} d\zeta e^{-E_\theta(\zeta)}$ .

*Proof.* Let  $E_{\min}$  be the minimum of  $E_\theta(z)$ . According to the previous theorem,  $E_{\min}$  is also the minimum of  $E_\theta(\zeta)$ . Therefore

$$\tilde{Z}_\theta = \int_{\{\zeta\}} d\zeta e^{-E_\theta(\zeta)} \leq \int_{\{\zeta\}} d\zeta e^{-E_{\min}} = e^{-E_{\min}} \leq \sum_{\{z\}} e^{-E_\theta(z)} = Z_\theta. \quad (3)$$

Therefore

$$\check{p}_\theta(\zeta) = \frac{e^{-E_\theta(\zeta)}}{Z_\theta} \leq \frac{e^{-E_\theta(\zeta)}}{\tilde{Z}_\theta} = p_\theta(\zeta). \quad (4)$$

$\square$

## B The equivalence of dVAE and REINFORCE in dealing with the cross-entropy term

In this Appendix, we show that the previous work with a BM prior, dVAE (?), is equivalent to REINFORCE when calculating the derivatives of the cross entropy term in the loss function. Note that a discrete variable reparametrized as  $z = \mathcal{H}(\rho - (1 - \bar{q}))$  is non-differentiable, due to the discontinuity caused by the Heaviside function. Consider calculating  $\nabla_{\phi} \mathbb{E}_{q_{\phi}(z|x)} [E_{\theta}(z)]$ , which appears in the gradients of the objective function. The gradients of the coupling terms can be written as:

$$\nabla_{\phi} \mathbb{E}_{q_{\phi}(z|x)} \left[ \sum_{i,j}^{n_z} z_i W_{ij} z_j \right] = \mathbb{E}_{\rho \sim \mathcal{U}} \left[ \nabla_{\phi} \sum_{i,j}^{n_z} z_i(\rho) W_{ij} z_j(\rho) \right]. \quad (5)$$

Using a spike(at 0)-and-exponential relaxation,  $r(\zeta_i|z_i)$ , i.e.,

$$r(\zeta_i|z_i) = \begin{cases} \delta(\zeta_i), & \text{if } z_i = 0 \\ \frac{\exp(-\zeta_i/\tau)}{Z}, & \text{if } z_i = 1, \end{cases} \quad (6)$$

where  $Z$  is the normalization constant. It is proved in (?) that the derivatives can be calculated as follows:

$$\mathbb{E}_{\rho \sim \mathcal{U}} \left[ \nabla_{\phi} \sum_{i,j}^{n_z} z_i(\rho) W_{ij} z_j(\rho) \right] = \mathbb{E}_{\rho \sim \mathcal{U}} \left[ \sum_{i,j}^{n_z} \frac{1 - z_i(\rho)}{1 - \bar{q}_i(\rho)} W_{ij} z_j(\rho) \nabla_{\phi} \bar{q}_i(\rho) \right]. \quad (7)$$

In order to show that this is equivalent to REINFORCE, first consider the spike (at one)-and-exponential distribution:

$$r(\zeta_i|z_i) = \begin{cases} \delta(\zeta_i), & \text{if } z_i = 1 \\ \frac{\exp(-\zeta_i/\tau)}{Z}, & \text{if } z_i = 0, \end{cases} \quad (8)$$

which is equivalent to spike(at 0)-and-exponential relaxation distribution (since there is nothing special about  $z = 0$ ). Using this distribution and the same line of reasoning used in (?), the derivatives of the coupling term become:

$$\mathbb{E}_{\rho \sim \mathcal{U}} \left[ \nabla_{\phi} \sum_{i,j}^{n_z} z_i(\rho) W_{ij} z_j(\rho) \right] = \mathbb{E}_{\rho \sim \mathcal{U}} \left[ \sum_{i,j}^{n_z} \frac{z_i(\rho)}{\bar{q}_i(\rho)} W_{ij} z_j(\rho) \nabla_{\phi} \bar{q}_i(\rho) \right]. \quad (9)$$

Now consider the REINFORCE trick applied to the coupling term:

$$\nabla_{\phi} \mathbb{E}_{q_{\phi}(z|x)} \left[ \sum_{i,j}^{n_z} z_i W_{ij} z_j \right] = \mathbb{E}_{q_{\phi}(z|x)} \left[ \sum_{i,j}^{n_z} z_i W_{ij} z_j \nabla_{\phi} \log q_{\phi}(z_i, z_j|x) \right]. \quad (10)$$

Assuming the general autoregressive encoder, where every  $z_i$  depends on all the preceding variables,  $z_{<i}$ , i.e., we can write

$$\begin{aligned} \log q_{\phi}(z_i, z_j|x) &= \sum_{\{z_k: k \notin \{i,j\}\}} z_i \log(\bar{q}(z_{<i})) + (1 - z_i) \log(1 - \bar{q}(z_{<i})) + \\ &\quad z_j \log(\bar{q}(z_{<j})) + (1 - z_j) \log(1 - \bar{q}(z_{<j})). \end{aligned} \quad (11)$$

Replacing this in Eq. 10, and noting that for any binary variable  $z_i$  we have  $z_i(1 - z_i) = 0$ , results in:

$$\begin{aligned} \nabla_{\phi} \mathbb{E}_{q_{\phi}(z|x)} \left[ \sum_{i,j}^{n_z} z_i W_{ij} z_j \right] &= \mathbb{E}_{q_{\phi}(z|x)} \left[ \sum_{i,j}^{n_z} z_i(z_{<i}) W_{ij} z_j(z_{<j}) \nabla_{\phi} \log \bar{q}(z_{<i}) \right] \\ &= \mathbb{E}_{\rho \sim \mathcal{U}} \left[ \sum_{i,j}^{n_z} z_i(\rho) W_{ij} z_j(\rho) \nabla_{\phi} \log \bar{q}_i(\rho) \right] \\ &= \mathbb{E}_{\rho \sim \mathcal{U}} \left[ \sum_{i,j}^{n_z} \frac{z_i(\rho)}{\bar{q}_i(\rho)} W_{ij} z_j(\rho) \nabla_{\phi} \bar{q}_i(\rho) \right], \end{aligned} \quad (12)$$

where the last equality is due to the law of unconscious statistician (?), *i.e.*, for a given function  $f(z)$ , we have

$$\mathbb{E}_{\rho \sim \mathcal{U}} [f(z(\rho))] = \mathbb{E}_{q_\phi(z|x)} [f(z)] .$$

Therefore, dVAE is using REINFORCE when dealing with the cross-entropy terms.
